# Supplementary material for: Ärztliche Kurzberatung zur Tabakentwöhnung – Ergebnisse der DEBRA Studie
Source: Atypon-hosted journal article supplement (doi:10.1024/0939-5911/a000574), 2019-01-31
Supplement: 0939-5911_a000574_esm1.pdf [file 0939-5911_a000574_esm1.pdf]

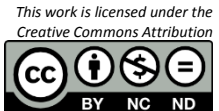

## Deutsche Befragung zum Rauchverhalten (DEBRA) – Baseline Befragung

**Stichprobe: Alle Personen über 14 Jahre in Privathaushalten in Deutschland**

### Erklärungen

K.A. = keine Angabe

Fragen mit Bezug zur "Smoking Toolkit Study" = \*\*

Fragen, die sich nur auf eine Subgruppe beziehen sind **in hellroter Farbe gekennzeichnet**.

Anweisungen an den Fragesteller sind **in hellblauer Farbe und in hellvioletter Farbe gekennzeichnet**.

Fragen/ Statements, die zu einem späteren Zeitpunkten (Folgewellen) oder nur bei einem Teil der Wellen gefragt werden sind **in hellgelber Farbe gekennzeichnet**.

Prüffragen **in hellgrüner Farbe gekennzeichnet**

**Z02.** Darf ich fragen wie alt Sie sind?

Bitte geben Sie nochmals das Alter ein

Jahre [Wert zwischen 14-99 erlauben] [„keine Angabe“ = 999]

Themawechsel!

**1.** Welcher der folgenden Zustände trifft am besten auf Sie zu? Bitte beachten, dass das Rauchen von Tabak gemeint ist und nicht von elektrischen Zigaretten. [smokerall]

Bitte Liste RV01 vorlegen!

1. Ich rauche Zigaretten, und zwar jeden Tag
2. Ich rauche Zigaretten, aber nicht jeden Tag
3. Ich rauche gar keine Zigaretten, aber ich rauche Tabak in anderer Form (zum Beispiel Pfeife oder Zigarre)
4. Ich habe in den vergangenen 12 Monaten vollständig mit dem Rauchen aufgehört
5. Ich habe vor mehr als einem Jahr vollständig mit dem Rauchen aufgehört
6. Ich habe nie geraucht (nie länger als ein Jahr)
7. K.A.

Die folgenden Fragen beschäftigen sich mit elektrischen Zigaretten (E-Zigaretten) oder ähnlichen Produkten wie E-Shisha, E-Zigarre oder E-Pfeife. Dies sind Produkte, die das Rauchen mit technischen Mitteln nachahmen, ohne dabei Tabak zu verbrennen. Bei der Nutzung wird eine aromatisierte Flüssigkeit (Liquid) verdampft und eingeatmet.

**2.** Haben Sie jemals eine elektrische Zigarette (E-Zigarette) oder ein ähnliches Produkt benutzt (wie zum Beispiel E-Shisha, E-Zigarre oder E-Pfeife)? [ecigall]

**Vorgaben bitte vorlesen!**

1. Ja, ich benutze diese bis heute [definiert aktuelle Nutzer]
2. Ja, ich habe diese früher regelmäßig benutzt, aber heute nicht mehr [definiert Ex-Nutzer]
3. Ja, ich habe diese früher mal ausprobiert, aber benutze heute keine mehr [definiert Experimentierer]
4. Nein, ich habe diese nie benutzt [definiert Nicht-Nutzer]
5. K.A.

**[Wenn Frage 0 = 1]**

Bei den folgenden Fragen sprechen wir von E-Zigaretten und meinen damit auch E-Shishas, E-Zigarren, E-Pfeifen oder ähnliche elektrische Inhalationsprodukte.

- 3.** In welchem Jahr oder in welchem Alter haben Sie mit dem Konsum von E-Zigaretten begonnen? Machen Sie bitte nur eine Angabe: geben Sie daher bitte entweder das Jahr oder das Alter an. Fehler! Textmarke nicht definiert. [ageecig]

Für „Weiß nicht“ oder „Keine Angabe“ bitte Button oben anklicken!

1. Jahr: <Jahreszahl> [Einen Wert zwischen 2000-2016]
2. Alter: <ganze Zahl> [Einen Wert zwischen 10-90]
3. Weiß nicht
4. K.A.

Prüffrage, wenn Jahr <Geburstjahr+10, wenn Alter >derzeitiges Alter, oder wenn unerlaubter Wert:  
Sind Sie sicher, dass die von Ihnen gemachte Angabe korrekt ist? – Ja/Nein

Bei „Ja“: Fragebogen läuft normal weiter

Bei „Nein“: Wiederholung der Frage

- 4.** Was würden Sie schätzen: an wie vielen der letzten 30 Tage haben Sie E-Zigaretten benutzt? Bitte wählen Sie einen Wert zwischen "0" (an keinem Tag) und "30" (an allen Tagen). [daysecig]

Für „Weiß nicht“ oder „Keine Angabe“ bitte Button oben anklicken!

1. Anzahl der Tage: <ganze Zahl> [Einen Wert zwischen 0-30 erlauben]
2. Weiß nicht
3. K.A.

- 5.** Was für eine Art von E-Zigarette benutzen Sie normalerweise? [typeecig]

Vorgaben bitte vorlesen!

1. Eine Einweg-E-Zigarette
2. Eine E-Zigarette mit ersetzbaren, bereits gefüllten Patronen
3. Eine E-Zigarette mit einem Tank, den man selber mit einem Liquid befüllen kann
4. Eine andere Art, nämlich: <freier Text>
5. K.A.

[Wenn Frage 5 = 1 oder 2]

- 6.** Wie viele Einweg-E-Zigaretten oder Patronen verbrauchen Sie derzeit durchschnittlich? Machen Sie bitte nur eine Angabe: geben Sie die Menge pro Tag oder, wenn Sie gelegentlicher Nutzer sind, pro Woche oder pro Monat an. [consumptionecig]

Für „Weiß nicht“ oder „Keine Angabe“ bitte Button oben anklicken!

1. Anzahl pro Tag: <ganze Zahl> [Einen Wert zwischen 1-50 erlauben]
2. Anzahl pro Woche: <ganze Zahl> [Einen Wert zwischen 1-300 erlauben]
3. Anzahl pro Monat: <ganze Zahl> [Einen Wert zwischen 1-500 erlauben]
4. Weiß nicht
5. K.A.

Prüffrage, wenn unerlaubter Wert

[Wenn Frage 5 = 3]

- 7.** Wie viel Milliliter Liquid verbrauchen Sie derzeit durchschnittlich? Machen Sie bitte nur eine Angabe: geben Sie die Menge pro Tag oder, wenn Sie gelegentlicher Nutzer sind, pro Woche oder pro Monat an. [liquidmlecig]

Für „Weiß nicht“ oder „Keine Angabe“ bitte Button oben anklicken!

1. Milliliter pro Tag: <ganze Zahl> [Einen Wert zwischen 1-30 erlauben]
2. Milliliter pro Woche: <ganze Zahl> [Einen Wert zwischen 1-100 erlauben]
3. Milliliter pro Monat: <ganze Zahl> [Einen Wert zwischen 1-200 erlauben]
4. Weiß nicht
5. K.A.

Prüffrage, wenn unerlaubter Wert

[Wenn Frage 0= 1]

- 8.** Benutzen Sie normalerweise E-Zigaretten mit oder ohne Nikotin? [nicotineecig]

Vorgaben bitte vorlesen!

1. Ausschließlich mit Nikotin
2. Hauptsächlich mit Nikotin
3. Hauptsächlich ohne Nikotin
4. Ausschließlich ohne Nikotin
5. Ich weiß nicht, ob meine E-Zigarette Nikotin enthält.
6. K.A.

[Wenn Frage 8= 1 oder 2 oder 3]

- 9.** Wie hoch ist die Nikotinkonzentration in den von Ihnen verwendeten Patronen oder Liquids?

[nicotinemlecig]

Für „Weiß nicht“ oder „Keine Angabe“ bitte Button oben anklicken!

1. Milligramm pro Milliliter: <ganze Zahl> [Einen Wert zwischen 1-30 erlauben]
2. Weiß nicht
3. K.A.

Prüffrage, wenn unerlaubter Wert

[Wenn Frage 0= 1]

**10.** Wo kaufen Sie normalerweise Ihre E-Zigarette oder Ihre Liquids? [purchaseecig]

[Mehrfachnennung möglich.]

Vorgaben bitte vorlesen!

1. In einem Geschäft, das auf Tabak oder E-Zigaretten spezialisiert ist
2. In einem sonstigen Geschäft (z.B. Tankstelle, Kiosk)
3. Im Internet
4. Telefonisch
5. K.A.

[Wenn Frage 0= 1 und wenn Alter >= 18]

**RV1109.** Haben Sie jemals einen elektrischen Joint (E-Joint) oder eine E-Zigarette geraucht, die mit Cannabis (Gras oder Haschisch) gefüllt war, also mit dem Ziel eine stimmungsverändernde Wirkung zu erzielen? [ejoint]

6. Ja, das habe ich mal ausprobiert
7. Ja, auf diese Art rauche ich gelegentlich oder regelmäßig Cannabis
8. Nein, noch nie
9. K.A.

[Wenn Frage 0= 1]

Bitte drehen Sie den Laptop so, dass die/der Befragte mit auf den nächsten Bildschirm sehen kann.

**11.** Warum benutzen Sie E-Zigaretten? [reasonecigx] [Mehrfachnennung möglich. Die Reihenfolge der Antwortmöglichkeiten variieren um order bias zu reduzieren.]

1. Um mit dem Rauchen von Tabak ganz aufzuhören
2. Um weniger Tabak zu rauchen, ohne ganz mit dem Rauchen aufzuhören
3. Weil es weniger schädlich ist als Tabak
4. Weil es weniger abhängig macht als Tabak
5. Weil es das Rauchverlangen (starker Drang/Druck) verringert
6. Um sie an Orten zu benutzen, wo das Rauchen von Tabak verboten ist
7. Aus Neugierde
8. Weil es Spaß macht
9. Weil es viele verschiedene Aromen/Geschmacksrichtungen gibt
10. Weil andere in meinem Umfeld es auch tun
11. Weil es mir besser schmeckt als das Rauchen von Tabak
12. Weil es cool/modern ist
13. Weil es billiger ist als Rauchen von Tabak
14. Weil es Leute in der Umgebung weniger stört als Rauchen von Tabak
15. Weil es mir schwer fällt, mit dem E-Zigarettenkonsum aufzuhören
16. Weil Personen in den Medien oder bekannte Persönlichkeiten E-Zigaretten benutzen
17. Aus anderen Gründen
18. K.A.

Bitte den Laptop so drehen, dass die/der Befragte nicht mehr mit auf den Bildschirm sehen kann!

[Wenn Frage 1 = 1, 2 oder 3] und [Wenn Frage 0 = 1 oder 2]

**12.** Wie hat sich Ihr Nutzungsverhalten entwickelt? [usagebehavior]

Bitte Liste RV12 vorlegen!

1. Ich habe früher nur Tabak geraucht, habe dann mit E-Zigaretten angefangen, und benutze jetzt Tabak und E-Zigaretten.
2. Ich habe früher nur Tabak geraucht, habe dann mit E-Zigaretten angefangen, und benutze jetzt wieder nur noch Tabak.
3. Ich habe früher nie Tabak geraucht, habe dann mit E-Zigaretten angefangen, und benutze jetzt nur noch Tabak.
4. Ich habe früher nie Tabak geraucht, habe dann mit E-Zigaretten angefangen, und benutze jetzt Tabak und E-Zigaretten.
5. K.A.

[Wenn Frage 1 = 1-3]

**13.** In Situationen in denen Sie nicht rauchen können oder dürfen (z.B. auf Bahnreisen, im Flugzeug), nutzen Sie dann regelmäßig eines oder mehrere der folgenden Produkte? [notallowx]

[Mehrfachnennung möglich.]

Bitte Liste RV13 vorlegen!

1. Nikotinkaugummi
2. Nikotinpastillen (Lutschtabletten)
3. Nikotinpflaster
4. Nikotin Inhalator\Inhaler
5. Nikotin Mundspray
6. Nikotin Nasalspray
7. E-Zigarette
8. Ein anderes Nikotinprodukt
9. Ich nutze keines der genannten Produkte
10. K.A.

[Wenn Frage 1 = 1-3]

**14.** Welche der folgenden Aussagen trifft auf Sie zu? [MRS\_v6]

Bitte Liste RV14 vorlegen!

1. Ich will nicht mit dem Rauchen aufhören.
2. Ich sollte mit dem Rauchen aufhören, aber ich möchte eigentlich nicht.
3. Ich will mit dem Rauchen aufhören, habe aber noch nicht darüber nachgedacht, wann.
4. Ich will **unbedingt** mit dem Rauchen aufhören, habe aber noch nicht darüber nachgedacht, wann.
5. Ich will mit dem Rauchen aufhören und hoffe, dies in naher Zukunft zu tun.
6. Ich will **unbedingt** mit dem Rauchen aufhören und habe vor, dies in den nächsten drei Monaten zu tun.
7. Ich will **unbedingt** mit dem Rauchen aufhören und habe vor, dies im nächsten Monat zu tun.
8. K.A.

[Wenn Frage 1 = 1-2 oder 4]

**15.** Wie viele Zigaretten rauchen Sie normalerweise? Oder, wie viele Zigaretten rauchten Sie normalerweise, bevor Sie mit dem Rauchen aufhörten? Machen Sie bitte nur eine Angabe: geben Sie die Menge pro Tag oder, wenn Sie gelegentlicher Nutzer sind, pro Woche oder pro Monat an. [amountcig]

Für „Weiß nicht“ oder „Keine Angabe“ bitte Button oben anklicken!

1. Anzahl pro Tag: <ganze Zahl> [Einen Wert zwischen 1-999 erlauben]
2. Anzahl pro Woche: <ganze Zahl> [Einen Wert zwischen 1-999 erlauben]
3. Anzahl pro Monat: <ganze Zahl> [Einen Wert zwischen 1-999 erlauben]
4. Weiß nicht
5. K.A.

[Wenn Frage 1 = 1-2]

**16.** Wie schnell rauchen Sie nach dem Aufwachen Ihre erste Zigarette? [FTNDmorning]

Vorgaben bitte vorlesen!

1. Innerhalb von 5 Minuten
2. 6-30 Minuten
3. 31-60 Minuten
4. Mehr als 60 Minuten
5. Weiß nicht
6. K.A.

[Wenn Frage 1 = 1-4]

**17.** Haben Sie im vergangenen Jahr eine Ärztin/ einen Arzt aufgesucht? [consultdoc]

1. Ja
2. Nein
3. Weiß nicht
4. K.A.

[Wenn Frage 17 = 1]

**18.** Was für eine Ärztin/ einen Arzt haben Sie aufgesucht? [Mehrfachnennung möglich.]

[specialistdocx]

1. Hausärztin/Hausarzt oder Allgemeinmediziner/in
2. Eine andere Ärztin/einen anderen Arzt (z.B. Kardiologie, Orthopädie, Neurologie)
3. K.A.

[Wenn Frage 18 = 1]

**19.** Welche der folgenden Situationen trifft auf Ihren letzten Besuch bei ihrer Hausärztin/ bei ihrem Hausarzt zu? [consultGP]

Bitte Liste RV19 vorlegen!

1. Es wurde nicht über mein Rauchverhalten gesprochen

2. Es wurde über mein Rauchverhalten gesprochen, aber die Ärztin/der Arzt hat mir nicht geraten, mit dem Rauchen aufzuhören
3. Die Ärztin/der Arzt hat mir geraten, mit dem Rauchen aufzuhören, aber mir dazu keine Behandlung angeboten
4. Die Ärztin/der Arzt hat mir geraten, mit dem Rauchen aufzuhören, und mir ein Medikament dazu empfohlen oder verschrieben (zum Beispiel Nikotinplaster oder Vareniclin)
5. Die Ärztin/der Arzt hat mir geraten, mit dem Rauchen aufzuhören, und mir dazu eine verhaltenstherapeutische Behandlung empfohlen (zum Beispiel Einzel- oder Gruppentherapie)
6. Die Ärztin/der Arzt hat mir geraten, mit dem Rauchen aufzuhören, und mir sowohl ein Medikament als auch eine verhaltenstherapeutische Behandlung empfohlen oder verschrieben
7. Weiß nicht
8. K.A.

[Wenn Frage 18 = 2]

**20.** Welche der folgenden Situationen trifft auf Ihren letzten Besuch bei einer anderen Ärztin/ bei einem anderen Arzt (z.B. Kardiologie, Orthopädie, Neurologie) zu? [consultother]

Bitte Liste RV 19 vorlegen!

1. Es wurde nicht über mein Rauchverhalten gesprochen
2. Es wurde über mein Rauchverhalten gesprochen, aber die Ärztin/der Arzt hat mir nicht geraten, mit dem Rauchen aufzuhören
3. Die Ärztin/der Arzt hat mir geraten, mit dem Rauchen aufzuhören, aber mir dazu keine Behandlung angeboten
4. Die Ärztin/der Arzt hat mir geraten, mit dem Rauchen aufzuhören, und mir ein Medikament dazu empfohlen oder verschrieben (zum Beispiel Nikotinplaster oder Vareniclin)
5. Die Ärztin/der Arzt hat mir geraten, mit dem Rauchen aufzuhören, und mir dazu eine verhaltenstherapeutische Behandlung empfohlen (zum Beispiel Einzel- oder Gruppentherapie)
6. Die Ärztin/der Arzt hat mir geraten, mit dem Rauchen aufzuhören, und mir sowohl ein Medikament als auch eine verhaltenstherapeutische Behandlung empfohlen oder verschrieben
7. Weiß nicht
8. K.A.

[Wenn Frage 1 = 1-4]

**21.** Wie häufig haben Sie in den vergangenen 24 Stunden das Verlangen verspürt zu rauchen??

[VRS24]

Bitte Liste RV21 vorlegen!

1. Überhaupt nicht
2. Selten
3. Manchmal

4. Häufig
5. Fast immer
6. Immer
7. K.A.

[Wenn Frage 21 = 2-6]

**22.** Wie stark war dieses Verlangen im Allgemeinen? [VRSgeneral]

Bitte Liste RV22 vorlegen!

1. Leicht
2. Mittelstark
3. Stark
4. Sehr stark
5. Extrem stark
6. K.A.

[Wenn Frage 1 = 1-4]

**23.** Wie viele ernsthafte Versuche haben Sie in den vergangenen 12 Monaten unternommen, mit dem Rauchen aufzuhören? Mit ernsthaftem Versuch meine ich, dass Sie vorhatten nie wieder zu rauchen. Falls Sie im letzten Jahr erfolgreich mit dem Rauchen aufgehört haben oder zurzeit versuchen mit dem Rauchen aufzuhören, zählen Sie dies bitte als Versuch mit. [quitattempts]

Für „Keine Angabe“ bitte Button oben anklicken!

1. <ganze Zahl> [Einen Wert zwischen 0-100, bzw. 1-100 wenn Frage 1=4 erlauben]
2. K.A.

Prüffrage, wenn unerlaubter Wert

[Wenn Frage 23 > "0"]

**24.** Wie lange ist ihr letzter Versuch, mit dem Rauchen aufzuhören, her? [quitattempplast]

Bitte Liste RV24 vorlegen!

1. In der letzten Woche
2. Länger als eine Woche
3. Länger als einen Monat
4. Länger als zwei Monate
5. Länger als drei Monate
6. Länger als sechs Monate
7. K.A.

[Wenn Frage 23 > "0"]

**25.** Wie lange hat ihr letzter Versuch, mit dem Rauchen aufzuhören, gedauert, bis Sie wieder angefangen haben? [quitattempplast]

Bitte Liste RV25 vorlegen!

1. Ich bin immer noch rauchfrei
2. Weniger als einen Tag
3. Weniger als eine Woche



4. Weniger als einen Monat
5. Weniger als zwei Monate
6. Weniger als drei Monate
7. Weniger als sechs Monate
8. Weniger als ein Jahr
9. K.A.

Prüffrage, wenn Frage 1=4 und Frage 25≠1:

Sind Sie sicher, dass die von Ihnen gemachte Angabe korrekt ist?

Bei „Nein“: Wiederholung der Frage

Bei „Ja“: Wiederholung von Frage 1:

**RV01\_1** Bitte korrigieren Sie Ihre Angabe an dieser Stelle:

Welcher der folgenden Zustände trifft am besten auf Sie zu?

Bitte beachten, dass das Rauchen von Zigaretten gemeint ist und nicht von elektrischen Zigaretten.

1. Ich rauche Zigaretten und zwar jeden Tag
2. Ich rauche Zigaretten, aber nicht jeden Tag
3. Ich rauche gar keine Zigaretten, aber ich rauche Tabak in anderer Form (zum Beispiel Pfeife oder Zigarre)
4. Ich habe in den vergangenen 12 Monaten vollständig mit dem Rauche aufgehört

[Wenn Frage 23 > "0"]

Bitte drehen Sie den Laptop so, dass die/der Befragte mit auf den nächsten Bildschirm sehen kann.

**26.** Welche der folgenden Sachen haben Sie bei diesem letzten Versuch unternommen, um Ihren Rauchstopp zu unterstützen? [Mehrfachnennung möglich] [quitattemptsx]

Gibt es noch etwas anderes, das Sie zur Unterstützung genutzt haben?

1. Kurzberatung durch eine Ärztin/ einen Arzt
2. Kurzberatung durch eine Apothekerin/ einen Apotheker
3. Verhaltenstherapeutische Behandlung zur Rauchentwöhnung (zum Beispiel Einzel- oder Gruppentherapie)
4. Telefonische Beratung zur Rauchentwöhnung
5. Nikotinersatztherapie (zum Beispiel Nikotinpflaster) auf Rezept von Ärztin/ Arzt
6. Nikotinersatztherapie (zum Beispiel Nikotinpflaster) ohne Rezept
7. Medikament Zyban mit dem Wirkstoff Bupropion
8. Medikament Champix mit dem Wirkstoff Vareniclin
9. E-Zigarette mit Nikotin
10. E-Zigarette ohne Nikotin
11. App zur Rauchentwöhnung auf einem Smartphone oder Tablet PC
12. Internetseite zur Rauchentwöhnung
13. Buch "Endlich Nichtraucher!" von Allen Carr
14. Anderes Buch über Rauchentwöhnung
15. Hypnotherapie
16. Akupunktur

17. Heilpraktiker
18. Eigene Willenskraft
19. Soziales Umfeld (Familie, Freunde, Kollegen)
20. Sonstiges
21. K.A.

Bitte den Laptop so drehen, dass die/der Befragte nicht mehr mit auf den Bildschirm sehen kann!

[Wenn Frage 23 > "0"]

**27.** Erinnern Sie sich bitte an Ihren letzten Versuch mit dem Rauchen aufzuhören. Haben Sie erst weniger geraucht, bevor Sie vollständig mit dem Rauchen aufgehört haben? [quitatemptabrupt]

Vorgaben bitte vorlesen!

1. Erst weniger geraucht
2. Direkt vollständig aufgehört, ohne erst weniger zu rauchen
3. K.A.

[Wenn Frage 23 > "0"]

**28.** Erinnern Sie sich bitte an Ihren letzten Versuch mit dem Rauchen aufzuhören. Auf welche der folgenden Weisen haben Sie dies getan? [quitatemptplanned]

Vorgaben bitte vorlesen!

1. Ich habe den Versuch geplant, und zwar für einen späteren Zeitpunkt des gleichen Tages oder für einen zukünftigen Tag
2. Ich habe den Versuch in dem Moment unternommen, in dem ich den Entschluss fasste, mit dem Rauchen aufzuhören.
3. K.A.

**RVWB1.** Wären Sie bereit zum Thema Rauchen noch einmal 7 kurze Fragen mit einer Dauer von maximal 5 Minuten telefonisch zu beantworten?

Bitte übergeben Sie jetzt das Unterstützungsschreiben der Universität Düsseldorf!

Dann würden wir die Angaben zu Ihrer Person sowie die Informationen zu diesem Themenbereich getrennt voneinander speichern und nur zum Zwecke der erneuten Befragung darauf zurückgreifen.

Auf Nachfrage – welche Informationen:

Telefonnummer, Alter, Geschlecht, Angaben aus dem Bereich „Rauchen“

1. Ja
2. Nein

[Wenn Frage RVWB1 = 1]

**RVWB2.** Bitte nennen Sie mir Ihren Vornamen, Nachnamen und Ihre Mobil-Nummer und/oder Festnetz-Nummer.

Vorname:

Nachname:

Mobil-Nummer:

Festnetz-Nummer:

**RVWB3. Bitte lesen Sie dem Befragten die eingegebene(n) Telefonnummer(n) zur Bestätigung  
noch einmal langsam vor!“**

<Mobil-Nummer>

<Festnetz-Nummer>

Ist/sind die Telefonnummer(n) korrekt?

1. Ja
2. Nein

Bei „Nein“ wird Frage RVWB2“ wiederholt.
